# Supplementary material
Source: MDPI journal article supplement (https://www.mdpi.com/2073-4395/13/7/1950)
Supplement: s1 [file s1]

## Supplementary Material

### Supplementary Figure S1.

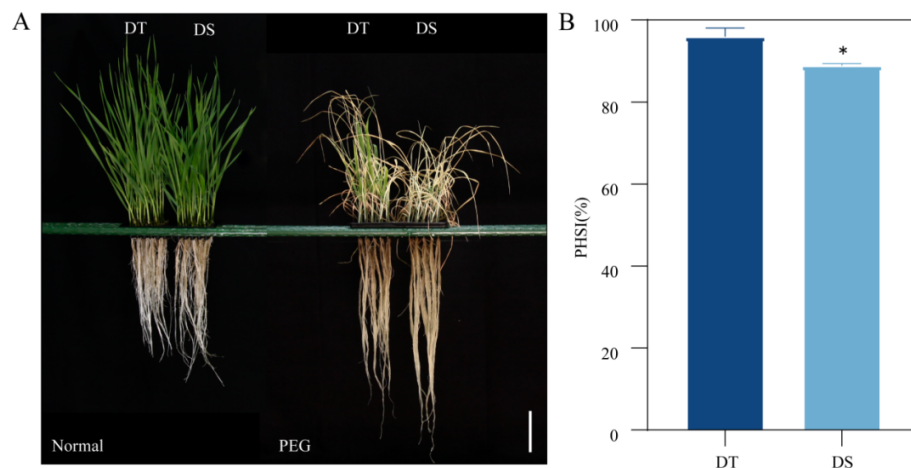

**Figure S1.** Identification of drought tolerance of two wheat cultivars. (A) Typical images of drought tolerant cultivar C6878 and drought sensitive cultivar S4185 under normal nutrient solution and PEG6000 stress, respectively. (B) Plant height stress index. Scale bar represents 5 cm. (×) represent the significant differences at  $P < 0.05$  (ANOVA test).



Supplementary Figure S2.

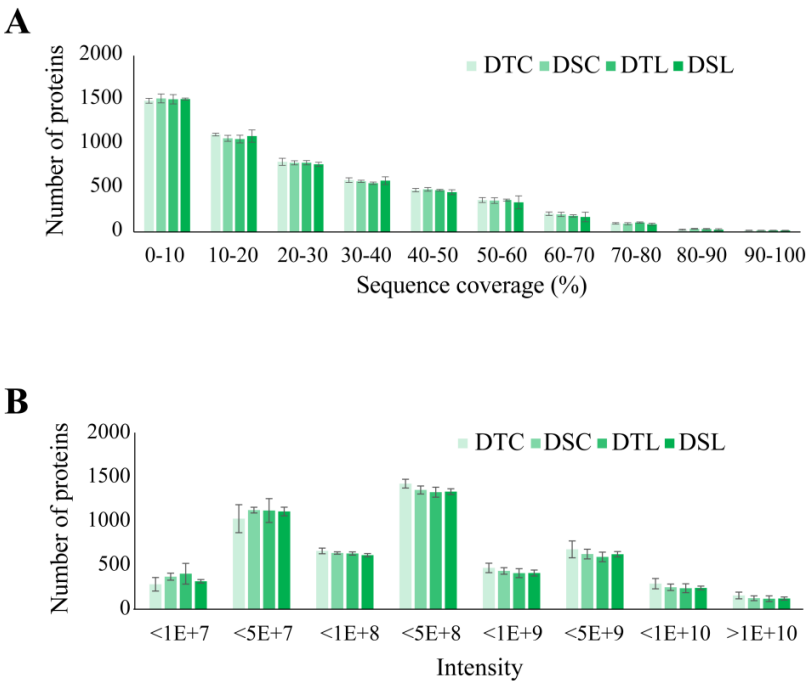

**Figure S2.** Distribution of the sequence coverages and the intensities of the identified proteins. (A) Distribution of the sequence coverages of the identified proteins. (B) Distribution of the intensities of the identified proteins.



**Table S1. Wheat nutrient solution formulations**

| Drug name                            | Normal nutrient              | LN nutrient                  |
|--------------------------------------|------------------------------|------------------------------|
|                                      | concentration                | concentration                |
| Ca(NO <sub>3</sub> ) <sub>2</sub>    | 2 mmol/L                     | 0.2 mmol/L                   |
| KH <sub>2</sub> PO <sub>4</sub>      | 0.2 mmol/L                   | 0.2 mmol/L                   |
| MgSO <sub>4</sub>                    | 1 mmol/L                     | 1 mmol/L                     |
| KCl                                  | 1.5 mmol/L                   | 1.5 mmol/L                   |
| CaCl <sub>2</sub> ·2H <sub>2</sub> O | 1.5 mmol/L                   | 2.4 mmol/L                   |
| H <sub>3</sub> BO <sub>3</sub>       | 1 × 10 <sup>-3</sup> mmol/L  | 1 × 10 <sup>-3</sup> mmol/L  |
| Na <sub>2</sub> MoO <sub>4</sub>     | 15 × 10 <sup>-3</sup> mmol/L | 15 × 10 <sup>-3</sup> mmol/L |
| CuSO <sub>4</sub> ·5H <sub>2</sub> O | 5 × 10 <sup>-4</sup> mmol/L  | 5 × 10 <sup>-4</sup> mmol/L  |
| ZnSO <sub>4</sub> ·5H <sub>2</sub> O | 1 × 10 <sup>-3</sup> mmol/L  | 1 × 10 <sup>-3</sup> mmol/L  |
| MnSO <sub>4</sub>                    | 1 × 10 <sup>-3</sup> mmol/L  | 1 × 10 <sup>-3</sup> mmol/L  |
| FeSO <sub>4</sub> ·7H <sub>2</sub> O | 0.1 mmol/L                   | 0.1 mmol/L                   |
| EDTA·Na <sub>2</sub>                 | 0.1 mmol/L                   | 0.1 mmol/L                   |



**Table S2. Primer sequences used in this study**

| Gene                                      | Primer name | Primer sequence (5'-3') | Purpose |
|-------------------------------------------|-------------|-------------------------|---------|
| TraesCS4D02G036000.3<br>(EIN2-A0A3B6JE28) | F           | TGCTTGGACTGGACTTGATAAG  | qRT-PCR |
|                                           | R           | GTCTGGAGTAGAGATGCCTGAT  |         |
| TraesCS4D02G198600.1<br>(MAPK3/6-A7L5U5)  | F           | TGTAAGTTGTTGCTGCTTCTTC  |         |
|                                           | R           | ATTTGCTCTCAAATCATGCTCC  |         |
| TraesCS2B02G414800.1<br>(ACS-A0A3B6CAM9)  | F           | CGTACGTACATTTGCTACGTAC  |         |
|                                           | R           | CTCCGTAAAACGTTAAGCTAGC  |         |
| TaActin                                   | F           | GCTCTCCAACAACATTGCCAAC  |         |
|                                           | R           | GCTTCTGCCTGTCACATACGC   |         |
